# Supplementary material for: Factors Associated with the Magnitude Of acUpuncture treatment effectS (FAMOUS): a meta-epidemiological study of acupuncture randomised controlled trials
Source: HighWire-hosted journal article supplement (doi:10.1136/bmjopen-2021-060237), 2022-08-01
Supplement: bmjopen-2021-060237supp001_data_supplement.pdf [file bmjopen-2021-060237supp001_data_supplement.pdf]

# Supplement

**eAppendix 1** Search strategy

**eAppendix 2** Independent variables ranked by importance

**eAppendix 3** Excluded independent variables from multivariable analysis

**eAppendix 4** Classification of acupuncture treatment frequency, duration, and the total number of treatments

**eAppendix 5** Independent variables included in multivariable analysis

**eTable 1.1** Basic characteristics of included studies

**eTable 1.2** Clinical characteristics of included studies

**eTable 1.3** Risk of bias of included studies

**eTable 2** Magnitude of significant factors impacting treatment effect in multivariable analysis

**eTable 3** Magnitude of significant factors in univariable analysis (excluded from multivariable analysis)

## eAppendix 1 Search strategy

### 1. MEDLINE via PubMed Strategy

((electroacupuncture or "acupuncture"[mesh terms] or "acupuncture"[all fields] or "acupuncture therapy"[mesh terms] or "acupuncture therapy"[all fields] or auricular acupuncture or auricular needle or ear acupuncture or auricular plaster therapy or transcutaneous electric nerve stimulation or tens or electric stimulation therapy or laser acupuncture or auricular point sticking or acupressure or dry needle or scalp acupuncture or scalp sensory or scalp stimulation or filliform needle or filiform needle) and (randomized controlled trial or Controlled Clinical Trial or placebo[Title/Abstract] or sham[Title/Abstract] or randomized[Title/Abstract] or randomly[Title/Abstract] or trial[Title/Abstract] or groups[Title/Abstract])) not (animals NOT humans) and ("2015/01/01"[date - publication] : "2019/12/31"[date - publication])

### 2. EMBASE Search strategy

('electroacupuncture'/exp OR electroacupuncture OR 'acupuncture therapy'/exp OR 'acupuncture therapy' OR (('acupuncture'/exp OR acupuncture) AND ('therapy'/exp OR therapy)) OR 'acupuncture moxibustion' OR 'acupuncture moxibustion'/exp OR (('acupuncture'/exp OR acupuncture) AND moxibustion) OR 'auricular acupuncture'/exp OR 'auricular acupuncture' OR (auricular AND ('acupuncture'/exp OR acupuncture)) OR 'auricular needle'/exp OR 'auricular needle' OR (auricular AND ('needle'/exp OR needle)) OR 'ear acupuncture'/exp OR 'ear acupuncture' OR (('ear'/exp OR ear) AND ('acupuncture'/exp OR acupuncture)) OR 'auricular plaster therapy' OR (auricular AND ('plaster'/exp OR plaster) AND ('therapy'/exp OR therapy)) OR 'transcutaneous electric nerve stimulation'/exp OR 'transcutaneous electric nerve stimulation' OR (transcutaneous AND electric AND ('nerve'/exp OR nerve) AND ('stimulation'/exp OR stimulation)) OR tens OR 'electric stimulation therapy'/exp OR 'electric stimulation therapy' OR (electric AND ('stimulation'/exp OR stimulation) AND ('therapy'/exp OR therapy)) OR 'laser acupuncture'/exp OR 'laser acupuncture' OR (('laser'/exp OR laser) AND ('acupuncture'/exp OR acupuncture)) OR 'auricular point sticking' OR (auricular AND point AND sticking) OR 'acupressure'/exp OR acupressure OR 'dry needle' OR (dry AND ('needle'/exp OR needle)) OR 'scalp acupuncture'/exp OR 'scalp acupuncture' OR (('scalp'/exp OR scalp) AND ('acupuncture'/exp OR acupuncture)) OR 'scalp sensory' OR (('scalp'/exp OR scalp) AND ('sensory'/exp OR sensory)) OR 'scalp stimulation' OR (('scalp'/exp OR scalp) AND ('stimulation'/exp OR stimulation)) OR 'filliform needle' OR (filliform AND ('needle'/exp OR needle)) OR 'filiform needle' OR (filiform AND ('needle'/exp OR needle)) AND ('randomized controlled trial'/exp OR 'randomized controlled trial' OR (randomized AND controlled AND ('trial'/exp OR trial)) OR 'controlled clinical trial'/exp OR 'controlled clinical trial' OR (controlled AND ('clinical'/exp OR clinical) AND ('trial'/exp OR trial)) OR 'placebo'/exp OR placebo OR sham OR randomized OR randomly OR 'trial'/exp OR trial OR groups) AND 'human'/exp NOT 'animal'/de NOT 'rat'/exp NOT 'mouse'/exp AND (2015:py OR 2016:py OR 2017:py OR 2018:py OR 2019:py)

### 3. CENTRAL

- **Title Abstract Keyword**

(electroacupuncture OR acupuncture OR auricular needle OR auricular plaster therapy OR transcutaneous electric nerve stimulation OR electric stimulation therapy OR auricular point sticking OR acupressure OR dry needle OR scalp sensory OR scalp stimulation OR filiform needle OR tens) AND (randomized controlled trial OR controlled clinical trial OR placebo OR sham OR randomized OR randomly OR trial OR groups) NOT (animal or rat or mouse)

- Publication year: from 2015 to 2019

**4. CNKI search strategy [Chinese database]**

**English translation from Chinese version**

- Professional retrieval:

(SU=('acupuncture'+ 'electroacupuncture'+ 'acupuncture and moxibustion'+ 'laser acupuncture'+ 'transcutaneous electric'+ 'transcutaneous nerve'+ 'electric stimulation'+ 'electroanalgesia'+ 'body acupuncture'+ 'auricular acupuncture'+ 'scalp acupuncture'+ 'filiform needle'+ 'dry needle'+ 'auricular point sticking'+ 'acupressure'+ 'laser acupoint irradiation'+ 'transcutaneous electric stimulation treatment'+ 'transcutaneous electric stimulation nerve'+ 'transcutaneous electric stimulation'+ 'acupuncture treatment'+ 'acupuncture and moxibustion therapy'+ 'transcutaneous nerve electric stimulation'+ 'laser acupoint'- 'animal'- 'rat'- 'mouse') OR

TI=('acupuncture'+ 'electroacupuncture'+ 'acupuncture and moxibustion'+ 'laser acupuncture'+ 'transcutaneous electric'+ 'transcutaneous nerve'+ 'electric stimulation'+ 'electroanalgesia'+ 'body acupuncture'+ 'auricular acupuncture'+ 'scalp acupuncture'+ 'filiform needle'+ 'dry needle'+ 'auricular point sticking'+ 'acupressure'+ 'laser acupoint irradiation'+ 'transcutaneous electric stimulation treatment'+ 'transcutaneous electric stimulation nerve'+ 'transcutaneous electric stimulation'+ 'acupuncture treatment'+ 'acupuncture and moxibustion therapy'+ 'transcutaneous nerve electric stimulation'+ 'laser acupoint'- 'animal'- 'rat'- 'mouse') OR

KY=('acupuncture'+ 'electroacupuncture'+ 'acupuncture and moxibustion'+ 'laser acupuncture'+ 'transcutaneous electric'+ 'transcutaneous nerve'+ 'electric stimulation'+ 'electroanalgesia'+ 'body acupuncture'+ 'auricular acupuncture'+ 'scalp acupuncture'+ 'filiform needle'+ 'dry needle'+ 'auricular point sticking'+ 'acupressure'+ 'laser acupoint irradiation'+ 'transcutaneous electric stimulation treatment'+ 'transcutaneous electric stimulation nerve'+ 'transcutaneous electric stimulation'+ 'acupuncture treatment'+ 'acupuncture and moxibustion therapy'+ 'transcutaneous nerve electric stimulation'+ 'laser acupoint'- 'animal'- 'rat'- 'mouse') OR

AB=('acupuncture'+ 'electroacupuncture'+ 'acupuncture and moxibustion'+ 'laser acupuncture'+ 'transcutaneous electric'+ 'transcutaneous nerve'+ 'electric stimulation'+ 'electroanalgesia'+ 'body acupuncture'+ 'auricular acupuncture'+ 'scalp acupuncture'+ 'filiform needle'+ 'dry needle'+ 'auricular point

sticking'+acupressure'+laser point irradiation'+transcutaneous electric stimulation treatment'+transcutaneous electric stimulation nerve'+transcutaneous electric stimulation'+acupuncture treatment'+acupuncture and moxibustion therapy'+transcutaneous nerve electric stimulation'+laser acupoint'-animal'-rat'-mouse')) AND (SU='random' or TI='random' or KY='random' or AB='random')

Note: SU=subject, TI=title, KY=keyword, AB=abstract

- Publication date: from 2015-01-01 to 2019-12-31.

### Chinese version

- 专业检索:

(SU=('针刺'+电针'+针灸'+激光针'+经皮电'+经皮神经'+电刺激'+电止痛'+体针'+耳针'+头针'+毫针'+干针'+耳穴贴压'+穴位按压'+激光穴位照射'+经皮电刺激治疗'+经皮电刺激神经'+经皮电刺激'+针刺治疗'+针灸疗法'+经皮神经电刺激'+激光穴位'-动物'-鼠') OR TI=('针刺'+电针'+针灸'+激光针'+经皮电'+经皮神经'+电刺激'+电止痛'+体针'+耳针'+头针'+毫针'+干针'+耳穴贴压'+穴位按压'+激光穴位照射'+经皮电刺激治疗'+经皮电刺激神经'+经皮电刺激'+针刺治疗'+针灸疗法'+经皮神经电刺激'+激光穴位'-动物'-鼠') OR KY=('针刺'+电针'+针灸'+激光针'+经皮电'+经皮神经'+电刺激'+电止痛'+体针'+耳针'+头针'+毫针'+干针'+耳穴贴压'+穴位按压'+激光穴位照射'+经皮电刺激治疗'+经皮电刺激神经'+经皮电刺激'+针刺治疗'+针灸疗法'+经皮神经电刺激'+激光穴位'-动物'-鼠') OR AB=('针刺'+电针'+针灸'+激光针'+经皮电'+经皮神经'+电刺激'+电止痛'+体针'+耳针'+头针'+毫针'+干针'+耳穴贴压'+穴位按压'+激光穴位照射'+经皮电刺激治疗'+经皮电刺激神经'+经皮电刺激'+针刺治疗'+针灸疗法'+经皮神经电刺激'+激光穴位'-动物'-鼠')) AND (SU='随机' or TI='随机' or KY='随机' or AB='随机')

注: SU=主题, TI=题名, KY=关键词, AB=摘要

- 发表时间 (Publication date): 2015-01-01 至 2019-12-31.

## 5. Wanfang search strategy [Chinese database]

### English translation from Chinese version

- Professional retrieval:

(Title OR Keyword:(“electroacupuncture” OR “laser acupuncture” OR “transcutaneous electric” OR “transcutaneous nerve” OR “electric stimulation” OR “electroanalgesia” OR “body acupuncture” OR “auricular acupuncture” OR “scalp acupuncture” OR “filiform needle” OR “dry needle” OR “auricular point sticking” OR “acupressure” OR “laser acupoint irradiation” OR “tens” OR “analgesic skin electrical stimulation” OR “acupuncture treatment” OR “acupuncture and moxibustion therapy”) OR Abstract:(“electroacupuncture” OR “laser acupuncture” OR “transcutaneous electric” OR “transcutaneous nerve” OR “electric stimulation” OR “electroanalgesia” OR “body acupuncture” OR “auricular acupuncture” OR “scalp acupuncture” OR “filiform needle” OR “dry needle” OR “auricular point sticking” OR “acupressure” OR “laser acupoint irradiation” OR “tens” OR “analgesic skin electrical stimulation” OR “acupuncture treatment” OR “acupuncture and

moxibustion therapy”) OR Title OR Keyword:(“acupuncture and moxibustion” OR “acupuncture”) OR Abstract:(“acupuncture and moxibustion” OR “acupuncture”) AND (Title OR Keyword:“random” OR Abstract:“random”) NOT (Title OR Keyword:(“animal” OR “rat” OR “mouse”) OR Abstract:(“animal” OR “rat” OR “mouse”))

- Publication type: Journal articles.
- Publication date: from 2015 to 2019.

#### Chinese version

- 专业检索:  
(题名或关键词:(“电针” OR “激光针” OR “经皮电” OR “经皮神经” OR “电刺激” OR “电止痛” OR “体针” OR “耳针” OR “头针” OR “毫针” OR “干针” OR “耳穴贴压” OR “穴位按压” OR “激光穴位照射” OR “tens” OR “镇痛皮肤电刺激” OR “针刺治疗” OR “针灸疗法”) OR 摘要:(“电针” OR “激光针” OR “经皮电” OR “经皮神经” OR “电刺激” OR “电止痛” OR “体针” OR “耳针” OR “头针” OR “毫针” OR “干针” OR “耳穴贴压” OR “穴位按压” OR “激光穴位照射” OR “tens” OR “镇痛皮肤电刺激” OR “针刺治疗” OR “针灸疗法”) OR 题名或关键词:(“针灸” OR “针刺”) OR 摘要:(“针灸” OR “针刺”)) AND (题名或关键词:(“随机” OR 摘要:“随机”) NOT (题名或关键词:(“动物” OR “鼠”) OR 摘要:(“动物” OR “鼠”))
- 文献类型(Publication type): 期刊论文(Journal articles).
- 发表时间 (Publication date): 2015 至 2019.

#### 6. VIP search strategy [Chinese database]

##### English translation from Chinese version

- Retrieval type search:  
(U=(electroacupuncture OR laser acupuncture OR transcutaneous electric OR transcutaneous electric stimulation treatment OR transcutaneous electric stimulation nerve OR transcutaneous electric stimulation OR transcutaneous nerve OR electric stimulation OR electroanalgesia OR body acupuncture OR auricular acupuncture OR scalp acupuncture OR filiform needle OR dry needle OR auricular point sticking OR acupressure OR laser acupoint irradiation OR “tens” OR analgesic skin electrical stimulation OR acupuncture treatment OR acupuncture and moxibustion therapy OR transcutaneous nerve electric stimulation OR laser acupoint) OR M=(acupuncture and moxibustion OR acupuncture) OR R=(acupuncture and moxibustion OR acupuncture)) AND (M=random OR R=random) NOT (M=(animal OR rat OR mouse) OR R=(animal OR rat OR mouse))  
Note: U=all fields, M=title/keyword, R=abstract
- publication date: from 2015 to 2019.

##### Chinese version

- 检索式检索:  
(U=(电针 OR 激光针 OR 经皮电 OR 经皮电刺激治疗 OR 经皮电刺激神经 OR 经皮电刺激 OR 经皮神经 OR 电刺激 OR 电止痛 OR 体针 OR 耳针 OR 头针 OR

毫针 OR 干针 OR 耳穴贴压 OR 穴位按压 OR 激光穴位照射 OR “tens” OR 镇痛皮肤电刺激 OR 针刺治疗 OR 针灸疗法 OR 经皮神经电刺激 OR 激光穴位) OR M=(针灸 OR 针刺) OR R=(针灸 OR 针刺)) AND (M=随机 OR R=随机) NOT (M=(动物 OR 鼠) OR R=(动物 OR 鼠))

注：字段标识符 U=任意字段、M=题名或关键词、R=文摘

- 时间限定 (publication date): 2015 至 2019.

## 7. CBM search strategy [Chinese database]

### English translation from Chinese version:

#1 【Rapid retrieval】acupuncture OR electroacupuncture OR auricular acupuncture OR scalp acupuncture OR body acupuncture OR filiform needle OR acupuncture and moxibustion OR acupuncture and moxibustion therapy OR transcutaneous nerve electric stimulation OR transcutaneous nerve OR electric stimulation OR laser acupuncture OR auricular point sticking OR dry needle OR acupressure OR laser acupoint irradiation OR acupuncture therapy OR electric stimulation therapy (publication date: 2015-2019)

#2 【Subject retrieval】acupoint, auricular acupuncture (publication date: 2015-2019)

#3 【Rapid retrieval】randomized controlled trial OR randomized controlled study OR randomized controlled clinical OR multicenter study OR multicenter clinical OR multicenter (publication date: 2015-2019)

#4 【Rapid retrieval】animal OR rat OR mouse (publication date: 2015-2019)

#5 (#1 or #2) and #3

#6 (#1 or #2) and publication type (randomized controlled trial OR multicenter study)

#7 (#5 or #6) not #4

### Chinese version:

#1 【快速检索状态】：针刺 OR 电针 OR 耳针 OR 头针 OR 体针 OR 毫针 OR 针灸 OR 针灸疗法 OR 经皮神经电刺激 OR 经皮神经 OR 电刺激 OR 激光针 OR 耳穴贴压 OR 干针 OR 穴位按压 OR 激光穴位照射 OR 针刺疗法 OR 电刺激疗法 (时间：2015-2019)

#2 【主题检索状态】：穴位, 耳针 (时间：2015-2019)

#3 【快速检索状态】：随机对照试验 OR 随机对照研究 OR 随机对照临床 OR 多中心研究 OR 多中心临床 OR 多中心 (时间：2015-2019)

#4 【快速检索状态】：动物 OR 大鼠 OR 小鼠 OR 鼠 (时间：2015-2019)

#5 (#1 or #2) and #3

#6 (#1 or #2) and 文献类型限定 (随机对照试验、多中心研究)

#7 (#5 or #6) not #4

## eAppendix 2

**eAppendix 2 Independent variables ranked by importance**

| Order | Independent variable                   | Category                                                                                                                                                                               |
|-------|----------------------------------------|----------------------------------------------------------------------------------------------------------------------------------------------------------------------------------------|
| 1     | Allocation concealment                 | 1=Probably yes<br>2=Probably no                                                                                                                                                        |
| 2     | Control group*                         | 1=Penetrating needle sham<br>2=Non-penetrating needling sham<br>3=Non-needle sham<br>4=High-intensity control (No sham)<br>5=Usual care (No sham)<br>6=Low-intensity control (No sham) |
| 3     | Total number of acupuncture treatments | 1=Low<br>2=High                                                                                                                                                                        |
| 4     | Randomization sequence generation      | 1=Probably yes<br>2=Probably no                                                                                                                                                        |
| 5     | Acupuncture stimulation                | 1=Manual acupuncture<br>2=Electro-acupuncture<br>3=Laser acupuncture<br>4=TEAS<br>5=Acupressure                                                                                        |
| 6     | Acupuncture type                       | 1=Penetrating acupuncture<br>2=Non-penetrating acupuncture                                                                                                                             |
| 7     | Blinding of outcome assessors          | 1=Probably yes<br>2=Probably no                                                                                                                                                        |
| 8     | Trial registration                     | 1=Reported<br>2=Not reported                                                                                                                                                           |
| 9     | Sample size                            | 1=101-149<br>2=150-499<br>3=>=500                                                                                                                                                      |

|    |                                 |                                                                                                                                                                                                                                                                                                                                                                                                                                                                       |
|----|---------------------------------|-----------------------------------------------------------------------------------------------------------------------------------------------------------------------------------------------------------------------------------------------------------------------------------------------------------------------------------------------------------------------------------------------------------------------------------------------------------------------|
| 10 | Therapeutic areas               | <p>1=Musculoskeletal system</p> <p>2=Neurology</p> <p>3=Gastroenterology</p> <p>4=Urology</p> <p>5=Mental health</p> <p>6=Obstetrics and gynecology</p> <p>7=Dermatology</p> <p>8=Respirology</p> <p>9=Sleep-wake disorders</p> <p>10=Cardiovascular disorders</p> <p>11=Ophthalmology</p> <p>12=Endocrinology and nutrition</p> <p>13=Oncology</p> <p>14=Trauma and injuries</p> <p>15=Otorhinolaryngology</p> <p>16=Acupuncture anesthesia</p> <p>17=Pediatrics</p> |
| 11 | Blinding of participants        | <p>1=Probably yes</p> <p>2=Probably no</p>                                                                                                                                                                                                                                                                                                                                                                                                                            |
| 12 | Frequency of treatment sessions | <p>1=Low</p> <p>2=High</p>                                                                                                                                                                                                                                                                                                                                                                                                                                            |
| 13 | Type of outcome                 | <p>1=Pain</p> <p>2=Quality of life (e.g., general quality of life, disease specific quality of life)</p> <p>3=Function</p> <p>4=Non-pain Symptoms (such as anxiety, depression, etc.)</p> <p>5=Major events</p>                                                                                                                                                                                                                                                       |
| 14 | Country                         | <p>1=Western countries (countries in Europe, America, Australia and Africa)</p> <p>2=Eastern countries (Asian countries)</p> <p>3= both Western and Eastern countries</p>                                                                                                                                                                                                                                                                                             |
| 15 | Acupuncture regimen             | <p>1=Fixed formula</p> <p>2=Flexible formula</p> <p>3=Individualized formula</p>                                                                                                                                                                                                                                                                                                                                                                                      |
| 16 | Location of needles             | <p>1=Local points only</p> <p>2=Distal points only</p> <p>3=Both local and distal points (only for body acupuncture)</p>                                                                                                                                                                                                                                                                                                                                              |



|    |                                                        |                                                                                                                                                    |
|----|--------------------------------------------------------|----------------------------------------------------------------------------------------------------------------------------------------------------|
| 17 | Education or training of practitioner                  | 1=Systematic acupuncture or TCM education (undergraduate, graduate, diploma training)<br>2=Short term training (none of the training mention in 1) |
| 18 | Number of centers                                      | 1=Single center<br>2=Multicenter                                                                                                                   |
| 19 | Number of needles                                      | 1=1-4<br>2=5-9<br>3=10-14<br>4=15-20<br>5=>20                                                                                                      |
| 20 | Depth of insertion                                     | 1=Deep needling (> 10mm)<br>2=Superficial needling (< 10mm)                                                                                        |
| 21 | Acupuncture manipulation after needles insertion       | 1=Yes<br>2=No<br>3=Not reported<br>4=Not applicable                                                                                                |
| 22 | Needle retention time                                  | 1= $\geq$ 20min<br>2=<20min                                                                                                                        |
| 23 | Intensity of stimulation                               | 1=Strong stimulation<br>2=Moderate stimulation<br>3=Mild stimulation<br>4=Not reported                                                             |
| 24 | Acupuncturist experience                               | 1=<5y<br>2=5-10y<br>3=>10y                                                                                                                         |
| 25 | Acupuncture-specific patient-practitioner interactions | 1=Yes (trialists allowed or encouraged the interactions)<br>2=No (the interactions were prohibited)<br>3=Not reported                              |
| 26 | Clinical specialty of practitioner                     | 1=Acupuncturist<br>2=Others<br>3=Not reported                                                                                                      |
| 27 | Publication language                                   | 1=English<br>2=Chinese<br>3=Other language                                                                                                         |
| 28 | Source of acupuncture regimen                          | 1=Expert consensus<br>2=Textbook or literature<br>3=Clinical experience<br>4=Mix of some                                                           |

|    |                       |                                                                                                                                                                                                                                     |
|----|-----------------------|-------------------------------------------------------------------------------------------------------------------------------------------------------------------------------------------------------------------------------------|
|    |                       | 5=Unclear                                                                                                                                                                                                                           |
| 29 | Needling angle        | 1=Reported<br>2=Not reported                                                                                                                                                                                                        |
| 30 | Needling direction    | 1=Reported<br>2=Not reported                                                                                                                                                                                                        |
| 31 | De qi                 | 1=Yes<br>2=No<br>3=Not reported<br>4=Not applicable                                                                                                                                                                                 |
| 32 | Patient expectations  | 1=Reported<br>2=Not reported                                                                                                                                                                                                        |
| 33 | Funding availability  | 1=Reported<br>2=Not reported                                                                                                                                                                                                        |
| 34 | Style of acupuncture  | 1=TCM acupuncture (TCMA)<br>2=Japanese acupuncture (JA)<br>3=Korean acupuncture (KA)<br>4=Western medical acupuncture (WMA)<br>5=Five Element acupuncture (FEA)<br>6=Scalp stimulation<br>7=Auricular acupuncture<br>8=Dry needling |
| 35 | Type of funding       | 1=National funding<br>2=Foundation funding<br>3=Provincial funding<br>4=Institutional funding<br>5=For-profit funding<br>6=Not reported                                                                                             |
| 36 | Type of Journal       | 1= CAM (Complementary and Alternative Medicine) journals<br>2=Non- CAM journals                                                                                                                                                     |
| 37 | Journal Impact factor | 1=0<br>2=Between 0 and 1.99<br>3=Between 2 and 4.99<br>4=No less than 5                                                                                                                                                             |
| 38 | Course of diseases    | 1=Acute or perioperative issue<br>2=Chronic disease                                                                                                                                                                                 |

|    |                                            |                                                                                                                                                                                                                               |
|----|--------------------------------------------|-------------------------------------------------------------------------------------------------------------------------------------------------------------------------------------------------------------------------------|
| 39 | Type of comparison                         | 1=Acupuncture vs no intervention or waiting list<br>2=Acupuncture vs sham acupuncture<br>3=Acupuncture +other intervention vs other intervention<br>4=Acupuncture +other intervention vs sham acupuncture +other intervention |
| 40 | Missing data reported                      | 1=Yes, stating missing data occur<br>2=No, stating missing data do not occur<br>3=No explicit statement                                                                                                                       |
| 41 | Proportion of missing data                 | 1=>20%<br>2=<=20%<br>3=Not reported                                                                                                                                                                                           |
| 42 | Stratification or block of randomization   | 1=Only stratification randomization used<br>2=Only block randomization used<br>3=Both stratification and block randomization used<br>4=Not reported                                                                           |
| 43 | Ever received acupuncture                  | 1=Yes<br>2=No<br>3=Not reported                                                                                                                                                                                               |
| 44 | Duration of treatment for chronic diseases | 1=1-4 weeks<br>2=5-8 weeks<br>3=9-12 weeks<br>4=>12 weeks                                                                                                                                                                     |
| 45 | Duration of treatment for acute disease    | 1=1 day<br>2=>1 day                                                                                                                                                                                                           |
| 46 | Longest follow-up time                     | 1=1-3 months<br>2=3-6 months<br>3=>6 months                                                                                                                                                                                   |

\*When one study included both sham and other interventions as comparators, we classified the category based on the sham type.

We classified sham acupuncture into three types: penetrating needle sham, non-penetrating needle sham and non-needle sham.

## eAppendix 3

### eAppendix 3 Excluded independent variables from multivariable analysis

#### Due to missing factor data

|                            |                                                                                                        |
|----------------------------|--------------------------------------------------------------------------------------------------------|
| 1                          | Total number of acupuncture treatments                                                                 |
| 2                          | Acupuncture stimulation (manual acupuncture, electroacupuncture, laser acupuncture, TEAS, acupressure) |
| 3                          | Source of acupuncture regimen                                                                          |
| 4                          | Duration of treatment_chronic                                                                          |
| 5                          | Duration of treatment_acute                                                                            |
| 6                          | Education or training of practitioners                                                                 |
| 7                          | Acupuncturist experience                                                                               |
| 8                          | Type of comparisons                                                                                    |
| 9                          | Longest follow-up time                                                                                 |
| 10                         | Missing data reported                                                                                  |
| 11                         | The proportion of missing data                                                                         |
| 12                         | Type of funding                                                                                        |
| 13                         | Stratification or block randomization                                                                  |
| 14                         | Needle retention time                                                                                  |
| 15                         | Needling angle                                                                                         |
| 16                         | Depth of insertion                                                                                     |
| 17                         | Number of needles used                                                                                 |
| 18                         | Acupuncture-specific patient-practitioner interactions                                                 |
| 19                         | Ever received acupuncture                                                                              |
| 20                         | Location of needles                                                                                    |
| 21                         | The clinical specialty of practitioners                                                                |
| 22                         | Acupuncture manipulation after needles inserted                                                        |
| 23                         | Needling direction                                                                                     |
| 24                         | Intensity of stimulation                                                                               |
| 25                         | De qi                                                                                                  |
| 26                         | Patient expectations                                                                                   |
| <b>Due to collinearity</b> |                                                                                                        |
| 27                         | Language of publication                                                                                |
| 28                         | Journal impact factors                                                                                 |
| 29                         | Trial registration                                                                                     |
| 30                         | Therapeutic areas                                                                                      |
| 31                         | Blinding of participants                                                                               |

## eAppendix 4

### eAppendix 4 Classification of acupuncture treatment frequency, duration and total number of treatments

| Category                                      | Low      | High     |
|-----------------------------------------------|----------|----------|
| <b>Frequency of treatment sessions</b>        |          |          |
| Acupressure                                   | ≤3/day   | >3/day   |
| Non-acupressure + Acute                       | 1/day    | >1/day   |
| Non-acupressure + Chronic                     | ≤3/week  | >3/w     |
| <b>Duration of treatments</b>                 |          |          |
| Acute diseases                                | 1 day    | >1 day   |
| Chronic diseases                              | ≤4 weeks | >4 weeks |
| <b>Total number of acupuncture treatments</b> |          |          |
| Acute + Acupressure                           | ≤3       | >3       |
| Acute + non-acupressure                       | 1        | >1       |
| Chronic + Acupressure                         | ≤12      | >12      |
| Chronic + non-acupressure                     | ≤12      | >12      |

## eAppendix 5

### eAppendix 5 Independent variables included in multivariable analysis

|    |                                       |
|----|---------------------------------------|
| 1  | Random sequence generation            |
| 2  | Allocation concealment                |
| 3  | Course of diseases (chronic or acute) |
| 4  | Acupuncture stimulation               |
| 5  | Acupuncture regimen                   |
| 6  | Frequency of treatment sessions       |
| 7  | Sample size                           |
| 8  | Number of centers                     |
| 9  | Type of control                       |
| 10 | Style of acupuncture                  |
| 11 | Country                               |
| 12 | Type of journal                       |
| 13 | Funding availability                  |
| 14 | Blinding of outcome assessors         |
| 15 | Type of outcome                       |

## eTables

| <b>eTable 1.1 Basic characteristics of included studies (n=584)</b>                |                |
|------------------------------------------------------------------------------------|----------------|
| <b>Characteristic</b>                                                              | <b>No. (%)</b> |
| <b>Year of publication</b>                                                         |                |
| 2015                                                                               | 67 (11.5)      |
| 2016                                                                               | 96 (16.4)      |
| 2017                                                                               | 133 (22.8)     |
| 2018                                                                               | 127 (21.8)     |
| 2019                                                                               | 161 (27.6)     |
| <b>Regions</b>                                                                     |                |
| Eastern regions (Asian countries) <sup>a</sup>                                     | 554 (94.9)     |
| Western regions (countries in Europe, America, Australia, and Africa) <sup>b</sup> | 29 (5.0)       |
| Both eastern and western regions <sup>c</sup>                                      | 1 (0.2)        |
| <b>Language</b>                                                                    |                |
| Chinese                                                                            | 506 (86.6)     |
| English                                                                            | 76 (13.0)      |
| Persian                                                                            | 2 (0.3)        |
| <b>Type of Journal</b>                                                             |                |
| Complementary and Alternative Medicine                                             | 297 (50.9)     |
| Non-Complementary and Alternative Medicine                                         | 287 (49.1)     |
| <b>Journal impact factor</b>                                                       |                |
| 0                                                                                  | 517 (88.5)     |
| 0.1-1.99                                                                           | 17 (2.9)       |
| 2-4.99                                                                             | 37 (6.3)       |
| >5                                                                                 | 13 (2.2)       |
| <b>Funding</b>                                                                     |                |
| Non for profit                                                                     |                |
| National                                                                           | 57 (9.8)       |
| Provincial                                                                         | 146 (25.0)     |
| Institutional                                                                      | 20 (3.4)       |
| Foundational                                                                       | 5 (0.9)        |
| For-profit                                                                         | 0              |
| Not reported                                                                       | 356 (60.9)     |
| <b>Randomized sample size</b>                                                      |                |
| 101-150                                                                            | 418 (71.6)     |
| 151-499                                                                            | 156 (26.7)     |
| >=500                                                                              | 10 (1.7)       |
| <b>Trial registration</b>                                                          |                |
| Reported                                                                           | 57 (9.8)       |
| Not reported                                                                       | 527 (90.2)     |
| <b>Informed consent with patients</b>                                              |                |
| Reported                                                                           | 254 (43.5)     |
| Not reported                                                                       | 330 (56.5)     |
| <b>Compensation for participants</b>                                               |                |
| Reported                                                                           | 2 (0.3)        |
| Not reported                                                                       | 582 (99.7)     |
| <b>Number of centers</b>                                                           |                |

|                                                            |            |
|------------------------------------------------------------|------------|
| Multicenter                                                | 36 (6.2)   |
| Single-center                                              | 546 (93.5) |
| Not reported                                               | 2 (0.3)    |
| <b>Primary analysis</b>                                    |            |
| Intention to treat analysis (Modified intention to treat)  | 37 (6.3)   |
| Per protocol analysis                                      | 1 (0.2)    |
| No explicit statement                                      | 546 (93.5) |
| <b>Methods dealing with missing participant data (MPD)</b> |            |
| Data deletion                                              | 3 (0.5)    |
| Single imputation                                          | 9(1.5)     |
| • Mean imputation                                          | 1 (0.2)    |
| • Last Observation Carrying Forward                        | 5 (0.9)    |
| • Regression for MPD                                       | 1 (0.2)    |
| worst-case scenarios                                       | 1 (0.2)    |
| best- and worst-case scenarios                             | 1 (0.2)    |
| Multiple imputation                                        | 9 (1.5)    |
| Mixed effect model for missing data                        | 2 (0.3)    |
| No missing data                                            | 27 (4.6)   |
| No explicit statement                                      | 534 (91.4) |

\* Each study can contribute more than one estimate.

<sup>a</sup> Eastern regions include China(n=540), Iran(n=11), South Korea(n=1), India(n=1) and Malaysia(n=1).

<sup>b</sup> Western regions include USA (n=9), Spain(n=4), Australia(n=4), Brazil(n=3), German(n=2), Turkey(n=2), Denmark, France, Sweden, UK, Australia and Zealand.

<sup>c</sup> Both eastern and western regions include one multicenter study conducted in China and the USA.



eTable 1.2 Clinical characteristics of included studies (n=584)

| Characteristic                                        | No. (%)    |
|-------------------------------------------------------|------------|
| <b>Therapeutic area *</b>                             |            |
| Neurology                                             | 203 (34.8) |
| Gastroenterology                                      | 77 (13.2)  |
| Musculoskeletal system                                | 58 (9.9)   |
| Obstetrics and gynecology                             | 54 (9.2)   |
| Mental health                                         | 53 (9.1)   |
| Trauma and injuries                                   | 34 (5.8)   |
| Urology                                               | 27 (4.6)   |
| Respirology                                           | 18 (3.1)   |
| Sleep-wake disorders                                  | 15 (2.6)   |
| Cardiovascular disorders                              | 12 (2.1)   |
| Acupuncture anesthesia                                | 10 (1.7)   |
| Endocrinology and nutrition                           | 8 (1.4)    |
| Oncology                                              | 8 (1.4)    |
| Dermatology                                           | 4 (0.7)    |
| Otorhinolaryngology                                   | 2 (0.3)    |
| Ophthalmology                                         | 1 (0.2)    |
| Pediatrics                                            | 1 (0.3)    |
| <b>Course of disease</b>                              |            |
| Acute (related to procedure such as surgery)          | 172 (29.4) |
| Chronic                                               | 412 (70.6) |
| <b>Patient expectation</b>                            |            |
| Reported                                              | 8 (1.4)    |
| Not reported                                          | 576 (98.6) |
| <b>Ever received acupuncture</b>                      |            |
| Yes                                                   | 3 (0.5)    |
| No                                                    | 5 (0.9)    |
| Not reported                                          | 576 (98.6) |
| <b>Style of acupuncture*</b>                          |            |
| Traditional Chinese acupuncture                       | 444 (76)   |
| Auricular acupuncture                                 | 78 (13.4)  |
| Western medical acupuncture                           | 24 (4.1)   |
| Scalp acupuncture                                     | 12 (2.1)   |
| Dry needling                                          | 2 (0.3)    |
| Not reported                                          | 24 (4.1)   |
| <b>Acupuncture stimulation*</b>                       |            |
| Manual acupuncture                                    | 313 (53.6) |
| Acupressure                                           | 131 (22.4) |
| Electro-acupuncture                                   | 99 (17.0)  |
| Transcutaneous Electrical Acupoint Stimulation (TEAS) | 44 (7.5)   |
| Laser acupuncture                                     | 1 (0.2)    |
| <b>Source of acupuncture regimen</b>                  |            |
| Textbook or literature                                | 61 (10.4)  |
| Expert consensus                                      | 9 (1.5)    |
| Clinical experience                                   | 4 (0.7)    |
| Mix of some                                           | 12 (2.1)   |
| Not reported                                          | 498 (85.3) |
| <b>Acupuncture regimen*</b>                           |            |
| Fixed regimen                                         | 461 (78.9) |
| Flexible regimen                                      | 93 (15.9)  |
| Individualized regimen                                | 29 (5.0)   |
| Not reported                                          | 1 (0.2)    |
| <b>Location of acupuncture points*</b>                |            |
| Local                                                 | 76 (13.0)  |
| Distal                                                | 64 (11.0)  |
| Both local and distal                                 | 292 (50.0) |
| Not reported                                          | 1 (0.2)    |

|                                                                                    |            |
|------------------------------------------------------------------------------------|------------|
| Not applicable                                                                     | 154 (26.4) |
| <b>Number of needles used*</b>                                                     |            |
| 1 to 4                                                                             | 54 (9.2)   |
| 5 to 9                                                                             | 116 (19.9) |
| 10 to 14                                                                           | 117 (20.0) |
| 15 to 20                                                                           | 70 (12.0)  |
| >20                                                                                | 38 (6.5)   |
| Not reported                                                                       | 18 (3.1)   |
| Not applicable                                                                     | 175 (30.0) |
| <b>De qi</b>                                                                       |            |
| Yes                                                                                | 265 (45.4) |
| No                                                                                 | 2 (0.3)    |
| Not reported                                                                       | 80 (13.7)  |
| Not applicable                                                                     | 237 (40.6) |
| <b>Depth of insertion*</b>                                                         |            |
| Deep needling (> 10mm)                                                             | 153 (26.2) |
| Superficial needling (< 10mm)                                                      | 14 (2.4)   |
| Not reported                                                                       | 244 (41.8) |
| Not applicable                                                                     | 175 (30.0) |
| <b>Acupuncture manipulation after needles inserted*</b>                            |            |
| Yes                                                                                | 267 (45.7) |
| No                                                                                 | 9 (1.5)    |
| Not reported                                                                       | 134 (22.9) |
| Not applicable                                                                     | 175 (30.0) |
| <b>The intensity of stimulation*</b>                                               |            |
| Strong stimulation                                                                 | 15 (2.6)   |
| Moderate stimulation                                                               | 4 (0.7)    |
| Mild stimulation                                                                   | 2 (0.3)    |
| Not reported                                                                       | 566 (96.9) |
| <b>Needling angle*</b>                                                             |            |
| Reported                                                                           | 146 (25.0) |
| Not reported                                                                       | 264 (45.2) |
| Not applicable                                                                     | 175 (30.0) |
| <b>Needling direction*</b>                                                         |            |
| Reported                                                                           | 87 (14.9)  |
| Not reported                                                                       | 323 (55.3) |
| Not applicable                                                                     | 175 (30.0) |
| <b>Needle retention time*</b>                                                      |            |
| <=20 min                                                                           | 116 (19.9) |
| > 20 min                                                                           | 296 (50.7) |
| Not reported                                                                       | 174 (29.8) |
| Not applicable                                                                     | 114 (19.5) |
| <b>Frequency of treatment sessions<sup>a</sup></b>                                 |            |
| Low                                                                                | 180 (30.8) |
| High                                                                               | 356 (61.0) |
| Not applicable                                                                     | 8 (1.4)    |
| Not reported                                                                       | 43 (7.4)   |
| <b>Duration of treatment for chronic diseases<sup>a</sup> (n=412)</b>              |            |
| 1-4 weeks                                                                          | 227 (55.1) |
| 5-8 weeks                                                                          | 79 (19.2)  |
| 9-12 weeks                                                                         | 53 (12.9)  |
| > 12 weeks                                                                         | 22 (5.3)   |
| Not reported                                                                       | 31 (7.5)   |
| <b>Duration of treatment for acute or perioperative issues<sup>a</sup> (n=172)</b> |            |
| One day                                                                            | 85 (49.4)  |
| > 1day                                                                             | 53 (30.8)  |
| Not reported                                                                       | 34 (19.8)  |
| <b>Total number of treatments<sup>a</sup></b>                                      |            |
| High                                                                               | 356 (61.0) |
| Low                                                                                | 128 (21.9) |

|                                                                  |            |
|------------------------------------------------------------------|------------|
| Not applicable                                                   | 7 (1.2)    |
| Not reported                                                     | 103 (17.6) |
| <b>Acupuncturist experience (years)</b>                          |            |
| <=5                                                              | 22 (3.8)   |
| 5-10y                                                            | 1 (0.2)    |
| >=10y                                                            | 6 (1.0)    |
| Not reported                                                     | 555 (95.0) |
| <b>Education or training of the practitioner</b>                 |            |
| Systematic acupuncture or Traditional Chinese Medicine Education | 37 (6.3)   |
| Short term training                                              | 55 (9.4)   |
| Not reported                                                     | 492 (84.3) |
| <b>The clinical specialty of the practitioner</b>                |            |
| Acupuncturist                                                    | 45 (7.7)   |
| Others                                                           | 65 (11.1)  |
| Not reported                                                     | 474 (81.2) |
| <b>Acupuncture-specific patient-practitioner interactions</b>    |            |
| Yes (trialists allowed or encouraged the interactions)           | 73 (12.5)  |
| No (the interactions were prohibited)                            | 43 (7.4)   |
| Not reported                                                     | 468 (80.1) |
| <b>Type of control group*</b>                                    |            |
| Penetrating needle sham                                          | 25 (4.3)   |
| Non-penetrating needle sham                                      | 13 (2.2)   |
| Non-needle sham                                                  | 41 (7.0)   |
| High-intensity control (No sham) <sup>b</sup>                    | 395 (67.6) |
| Usual care control (No sham)                                     | 145 (24.8) |
| Low-intensity control (No sham) <sup>c</sup>                     | 2 (0.3)    |
| <b>Type of comparisons*</b>                                      |            |
| Acupuncture vs. waitlist or no intervention                      | 3 (0.5)    |
| Acupuncture vs. sham acupuncture                                 | 43 (7.4)   |
| Acupuncture + other interventions vs. other interventions        | 528 (90.4) |
| Acupuncture + other interventions vs. sham acupuncture + other   | 36 (6.2)   |
| <b>Type of outcome*</b>                                          |            |
| Pain                                                             | 177 (30.3) |
| Non-pain symptoms                                                | 267 (45.7) |
| Function                                                         | 314 (53.8) |
| Quality of life                                                  | 46 (7.9)   |
| Major events                                                     | 54 (9.2)   |
| <b>Longest follow-up time</b>                                    |            |
| 1-3 months                                                       | 52 (8.9)   |
| 3-6 months                                                       | 18 (3.1)   |
| >6 months                                                        | 7 (1.2)    |
| End of treatment                                                 | 507 (86.8) |

\* Each study can contribute more than one estimate.

<sup>a</sup> We classified the frequency of treatment sessions, duration of treatments, and the total number of treatments into high and low according to the categories of type of acupuncture stimulation and course of diseases. Details of criteria were provided in eAppendix 4.

<sup>b</sup> In the high-intensity control group, patients received the specific protocol-guided treatment with identical aims to acupuncture treatment.

<sup>c</sup> In the low-intensity control, some active treatments are not permitted. For example, in an RCT where acupuncture was the intervention for low back pain, patients in the waitlist control group could take oral nonsteroidal anti-inflammatory drugs but prohibited to take analgesics for central nervous systems.

| <b>eTable 1.3 Risk of bias of included studies (n=584)</b>          |                |
|---------------------------------------------------------------------|----------------|
| <b>Characteristic</b>                                               | <b>No. (%)</b> |
| <b>Random sequence generation</b>                                   |                |
| Inadequate or unclear                                               | 246 (42.1)     |
| Adequate                                                            | 338 (57.9)     |
| <b>Allocation concealment</b>                                       |                |
| Inadequate or unclear                                               | 536 (91.8)     |
| Adequate                                                            | 48 (8.2)       |
| <b>Blinding of outcome assessors</b>                                |                |
| No and probably no                                                  | 521 (89.2)     |
| Yes and probably yes                                                | 63 (10.8)      |
| <b>Blinding of participants*</b>                                    |                |
| No and probably no                                                  | 536 (91.8)     |
| Yes and probably yes                                                | 63 (10.8)      |
| <b>Success of participants' blinding**</b>                          |                |
| Yes                                                                 | 7 (70.0)       |
| No                                                                  | 3 (30.0)       |
| <b>Stratification or block randomization</b>                        |                |
| Only used Stratification                                            | 4 (0.7)        |
| Only used Block randomization                                       | 14 (2.4)       |
| Stratification and block randomization                              | 17 (2.9)       |
| Not reported                                                        | 549 (94.0)     |
| <b>Missing data reported</b>                                        |                |
| Yes, state MPD occurs (in the main text or CONSORT flow diagram)    | 100 (17.1)     |
| Yes, state MPD did not occur (in the main text or the CONSORT flow) | 27 (4.6)       |
| Not reported                                                        | 457 (78.3)     |
| <b>The proportion of missing data</b>                               |                |
| 0%                                                                  | 27 (4.6)       |
| < 20%                                                               | 94 (16.1)      |
| >20%                                                                | 6 (1.0)        |
| Not reported                                                        | 457 (78.3)     |

\* Each study can contribute more than one estimate.

\*\* Only ten studies conducted test the success of participants' blinding



**eTable 2 Magnitude of significant factors impacting treatment effect in multivariable analysis**

| <b>Significant predictors</b>          | <b>Differences of adjusted SMD</b> | <b>95% CI</b> | <b>P-value</b> |
|----------------------------------------|------------------------------------|---------------|----------------|
| <b>Type of outcome</b>                 |                                    |               |                |
| Quality of life vs major events        | 0.51                               | 0.24 to 0.77  | <0.001         |
| Pain vs major events                   | 0.48                               | 0.27 to 0.69  | <0.001         |
| Function vs major events               | 0.41                               | 0.21 to 0.61  | <0.001         |
| Non-pain symptoms vs major events      | 0.32                               | 0.12 to 0.52  | <0.001         |
| Pain vs non-pain symptoms              | 0.16                               | 0.04 to 0.27  | 0.01           |
| Function vs non-pain symptoms          | 0.09                               | 0 to 0.19     | 0.06           |
| Quality of life vs non-pain symptoms   | 0.19                               | -0.01 to 0.39 | 0.06           |
| Pain vs function                       | 0.06                               | -0.05 to 0.18 | 0.27           |
| Quality of life vs pain                | 0.03                               | -0.18 to 0.24 | 0.77           |
| Quality of life vs function            | 0.10                               | -0.10 to 0.29 | 0.35           |
| <b>Number of centers</b>               |                                    |               |                |
| Single center vs multicenter           | 0.38                               | 0.10 to 0.66  | 0.01           |
| <b>Acupuncture type</b>                |                                    |               |                |
| Penetration vs non-penetration         | 0.34                               | 0.15 to 0.53  | <0.001         |
| <b>Frequency of treatment sessions</b> |                                    |               |                |
| High vs low                            | 0.19                               | 0.03 to 0.35  | 0.02           |
| <b>Funding availability</b>            |                                    |               |                |
| Not reported vs reported               | 0.12                               | 0 to 0.25     | 0.04           |

SMD=standardized mean difference; CI=confidence interval; Vs=versus

| <b>eTable 3 Magnitude of significant factors in univariable analyses (excluded from multivariable analysis)</b> |                                                             |
|-----------------------------------------------------------------------------------------------------------------|-------------------------------------------------------------|
| <b>Predictors</b>                                                                                               | <b>Differences of adjusted SMD (95% CI), <i>P</i> value</b> |
| <b>Total number of acupuncture treatments</b>                                                                   |                                                             |
| High vs low                                                                                                     | 0.48 (0.33 to 0.62), <0.001                                 |
| <b>Type of acupuncture stimulation</b>                                                                          |                                                             |
| Manual acupuncture vs electro-acupuncture                                                                       | 0.21 (0.06 to 0.37), 0.008                                  |
| Manual acupuncture vs Laser acupuncture                                                                         | -0.37(-1.73 to 0.99), 0.60                                  |
| Manual acupuncture vs TEAS                                                                                      | 0.64(0.41 to 0.86), <0.001                                  |
| Manual acupuncture vs acupressure                                                                               | 0.41(0.26 to 0.56), <0.001                                  |
| Electro-acupuncture vs Laser acupuncture                                                                        | -0.58 (-1.95 to 0.78), 0.40                                 |
| Electro-acupuncture vs TEAS                                                                                     | 0.42(0.17 to 0.68), 0.001                                   |
| Electro-acupuncture vs acupressure                                                                              | 0.19(0.01 to 0.38), 0.04                                    |
| Laser acupuncture vs TEAS                                                                                       | 1.01(-0.37 to 2.38), 0.15                                   |
| Laser acupuncture vs acupressure                                                                                | 0.78(-0.59 to 2.14), 0.26                                   |
| TEAS vs acupressure                                                                                             | -0.23(-0.47 to 0.01), 0.06                                  |
| <b>Source of acupuncture regimen</b>                                                                            |                                                             |
| Expert consensus vs textbook or literature                                                                      | -0.56(-0.87 to -0.26), 0.001                                |
| Expert consensus vs clinical experience                                                                         | -0.21(-0.73 to 0.31), 0.42                                  |
| Expert consensus vs mix of some                                                                                 | -0.10(-0.48 to 0.28), 0.60                                  |
| Textbook or literature vs clinical experience                                                                   | 0.35(-0.10 to 0.80), 0.12                                   |
| Textbook or literature vs mix of some                                                                           | 0.46(0.19 to 0.74), 0.001                                   |
| Clinical experience vs mix of some                                                                              | 0.11(-0.39 to 0.61), 0.66                                   |
| <b>Duration of treatment_chronic</b>                                                                            |                                                             |
| 1-4 weeks vs 5-8 weeks                                                                                          | 0.28(0.09 to 0.48), 0.005                                   |
| 1-4 weeks vs 9-12 weeks                                                                                         | 0.28(0.06 to 0.51), 0.01                                    |
| 1-4 weeks vs > 12 weeks                                                                                         | 0.39(0.05 to 0.73), 0.03                                    |
| 5-8 weeks vs 9-12 weeks                                                                                         | -0.002(-0.27 to 0.26), 0.99                                 |
| 5-8 weeks vs > 12 weeks                                                                                         | 0.11(-0.26 to 0.47), 0.57                                   |
| 9-12 weeks vs > 12 weeks                                                                                        | 0.11(-0.28 to 0.49), 0.58                                   |
| <b>Patient expectation</b>                                                                                      |                                                             |
| Not reported vs reported                                                                                        | 0.79(0.33 to 1.25), <0.001                                  |

| <b>Education or training of practitioner</b>                                                                                                     |                               |
|--------------------------------------------------------------------------------------------------------------------------------------------------|-------------------------------|
| Systematic acupuncture or TCM education (undergraduate, graduate, diploma training) vs short term training (none of the training mentioned in 1) | -0.22(-0.44 to -0.01), 0.04   |
| <b>Type of comparisons</b>                                                                                                                       |                               |
| Acupuncture vs waitlist or no intervention vs Acupuncture vs sham acupuncture                                                                    | 0.04(-0.52 to 0.59), 0.90     |
| Acupuncture vs waitlist or no intervention vs Acupuncture + other interventions vs other interventions                                           | -0.40(-1.00 to 0.17), 0.17    |
| Acupuncture vs waitlist or no intervention vs Acupuncture + other interventions vs sham acupuncture + other interventions                        | 0.09(-0.51 to 0.70), 0.77     |
| Acupuncture vs sham acupuncture vs Acupuncture + other interventions vs other interventions                                                      | -0.44(-0.63 to -0.24), <0.001 |
| Acupuncture vs sham acupuncture vs Acupuncture + other interventions vs sham acupuncture + other interventions                                   | 0.05(-0.23 to 0.34), 0.70     |
| Acupuncture + other interventions vs other interventions vs Acupuncture + other interventions vs sham acupuncture + other interventions          | 0.49(0.28 to 0.70), <0.001    |
| <b>Blinding of participants</b>                                                                                                                  |                               |
| Probably no vs probably yes                                                                                                                      | 0.49(0.33 to 0.65), <0.001    |
| <b>Therapeutic areas</b>                                                                                                                         |                               |
| Gastroenterology vs Musculoskeletal system                                                                                                       | -0.34(-0.59 to -0.09), 0.01   |
| Gastroenterology vs Neurology                                                                                                                    | -0.52(-0.71 to -0.34), <0.001 |
| Gastroenterology vs Respiriology                                                                                                                 | -0.42(-0.82 to -0.01), 0.04   |
| Dermatology vs Endocrinology and nutrition                                                                                                       | 0.95(0.01 to 1.89), 0.05      |
| Endocrinology and nutrition vs Musculoskeletal system                                                                                            | -0.63(-1.11 to -0.16), 0.01   |
| Endocrinology and nutrition vs Neurology                                                                                                         | -0.82(-1.23 to -0.37), <0.001 |
| Endocrinology and nutrition vs Respiriology                                                                                                      | -0.71(-1.28 to -0.14), 0.02   |
| Obstetrics and gynecology vs Musculoskeletal system                                                                                              | -0.38(-0.73 to -0.04), 0.03   |
| Obstetrics and gynecology vs Neurology                                                                                                           | -0.57(-0.87 to -0.27), <0.001 |
| Mental health vs Neurology                                                                                                                       | -0.42(-0.63 to -0.21), <0.001 |
| Musculoskeletal system vs Oncology                                                                                                               | 0.69(0.14 to 1.23), 0.01      |
| Musculoskeletal system vs Obstetrics and                                                                                                         | 0.40(0.13 to 0.67), 0.003     |



|                                                                                                                                                  |                               |
|--------------------------------------------------------------------------------------------------------------------------------------------------|-------------------------------|
| <b>gynecology</b>                                                                                                                                |                               |
| Musculoskeletal system vs Trauma and injuries                                                                                                    | 0.39(0.09 to 0.70), 0.01      |
| Oncology vs Neurology                                                                                                                            | -0.87(-1.39 to -0.35), 0.001  |
| Oncology vs Respiriology                                                                                                                         | -0.76(-1.39 to -0.13), 0.02   |
| Neurology vs Obstetrics and gynecology                                                                                                           | 0.59(0.38 to 0.80), <0.001    |
| Neurology vs Sleep-wake disorders                                                                                                                | 0.52(0.14 to 0.89), 0.007     |
| Neurology vs Respiriology                                                                                                                        | 0.58(0.33 to 0.84), <0.001    |
| Respirology vs Trauma and injuries                                                                                                               | 0.47(0.03 to 0.91), 0.04      |
| <b>Longest follow-up time</b>                                                                                                                    |                               |
| 1-3months vs 3-6months                                                                                                                           | 0.14(-0.25 to 0.53), 0.48     |
| 1-3months vs >6months                                                                                                                            | 0.02(-0.51 to 0.55), 0.94     |
| 1-3months vs end of treatment                                                                                                                    | -0.41(-0.61 to -0.21), <0.001 |
| 3-6months vs >6months                                                                                                                            | -0.12(-0.71 to 0.48), 0.70    |
| 3-6months vs end of treatment                                                                                                                    | -0.55(-0.89 to -0.20), 0.002  |
| >6months vs end of treatment                                                                                                                     | -0.43(-0.92 to 0.07), 0.09    |
| <b>Missing data reported</b>                                                                                                                     |                               |
| Yes, state MPD occur (in the main text or in CONSORT flow diagram) vs Yes, state MPD did not occur (in the main text or in CONSORT flow diagram) | -0.40(-0.61 to -0.18), 0.001  |
| <b>Proportion of missing data</b>                                                                                                                |                               |
| 0% vs < 20%                                                                                                                                      | 0.37(0.16 to 0.59), 0.001     |
| 0% vs ≥20%                                                                                                                                       | 0.68(0.28 to 1.08), 0.001     |
| < 20% vs ≥20%                                                                                                                                    | 0.30(-0.06 to 0.67), 0.10     |
| <b>Trial registration</b>                                                                                                                        |                               |
| Not reported vs reported                                                                                                                         | 0.76(0.59 to 0.94), <0.001    |
| <b>Type of funding</b>                                                                                                                           |                               |
| National vs foundation                                                                                                                           | 0.21(-0.28 to 0.69), 0.40     |
| National vs provincial                                                                                                                           | -0.54(-0.75 to -0.33), <0.001 |
| National vs institution                                                                                                                          | -0.05(-0.39 to 0.28), 0.75    |
| Foundation vs provincial                                                                                                                         | -0.75(-1.21 to -0.28), 0.002  |
| Foundation vs institution                                                                                                                        | -0.26(-0.76 to 0.24), 0.30    |
| Provincial vs institution                                                                                                                        | 0.49(0.18 to 0.79), 0.002     |
| <b>Publication language</b>                                                                                                                      |                               |
| Chinese vs English                                                                                                                               | 0.72(0.57 to 0.88), <0.001    |
| Chinese vs Persian                                                                                                                               | 0.76(-0.41 to 1.92), 0.20     |
| English vs Persian                                                                                                                               | 0.03(-1.14 to 1.20), 0.96     |
| <b>Journal Impact factor</b>                                                                                                                     |                               |
| 0 vs. 0.1-1.99                                                                                                                                   | 0.6(0.29 to 0.92), 0.001      |
| 0 vs 2-4.99                                                                                                                                      | 0.7(0.49 to 0.91), <0.001     |

|                                                                                        |                            |
|----------------------------------------------------------------------------------------|----------------------------|
| 0 vs $\geq 5$                                                                          | 1.02(0.67 to 1.37), <0.001 |
| 0.1-1.99 vs 2-4.99                                                                     | 0.1(-0.27 to 0.47), 0.60   |
| 0.1-1.99 vs $\geq 5$                                                                   | 0.42(-0.04 to 0.88), 0.07  |
| 2-4.99 vs $\geq 5$                                                                     | 0.32(-0.08 to 0.72), 0.12  |
| <b>Stratification or block randomization</b>                                           |                            |
| Only stratification randomization used vs. only block randomization used               | -0.56(-1.36 to 0.25), 0.18 |
| Only stratification randomization used vs. both stratification and block randomization | -0.02(-0.81 to 0.77), 0.96 |
| Only block randomization used vs. both stratification and block randomization          | 0.53(0.04 to 1.02), 0.03   |
